# Supplementary material
Source: Springer Nature journal article supplement (https://www.springermedizin.de/resource/supplementary/12891_2007_399_MOESM2_ESM.pdf/9510962)

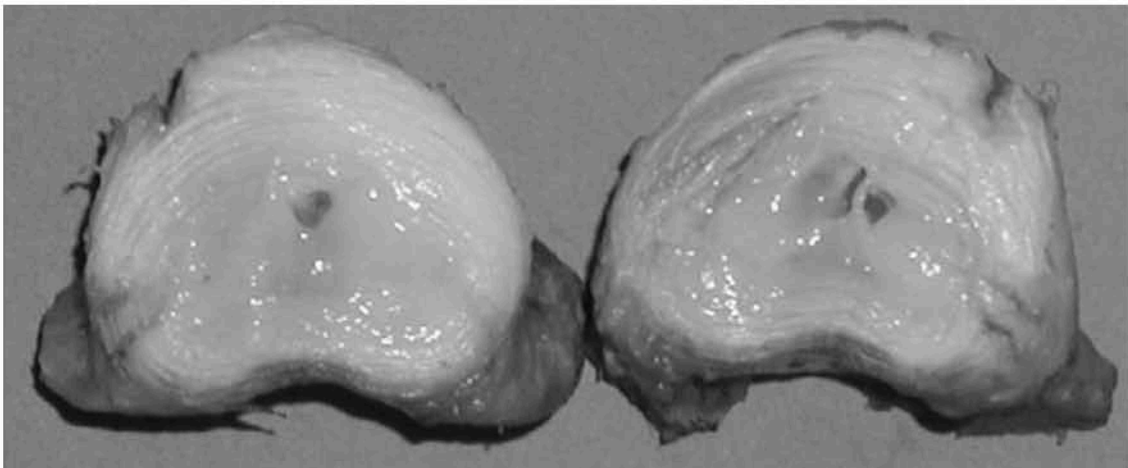

a

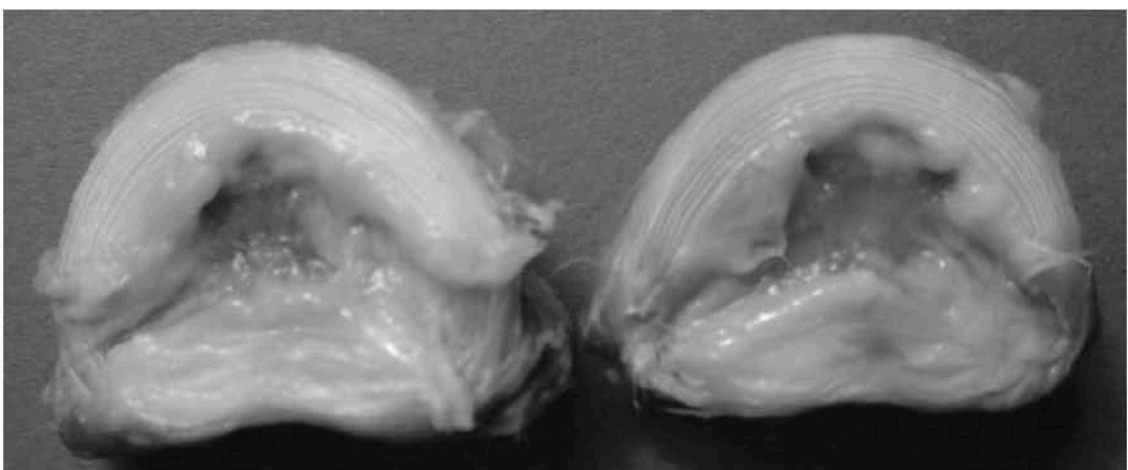

b

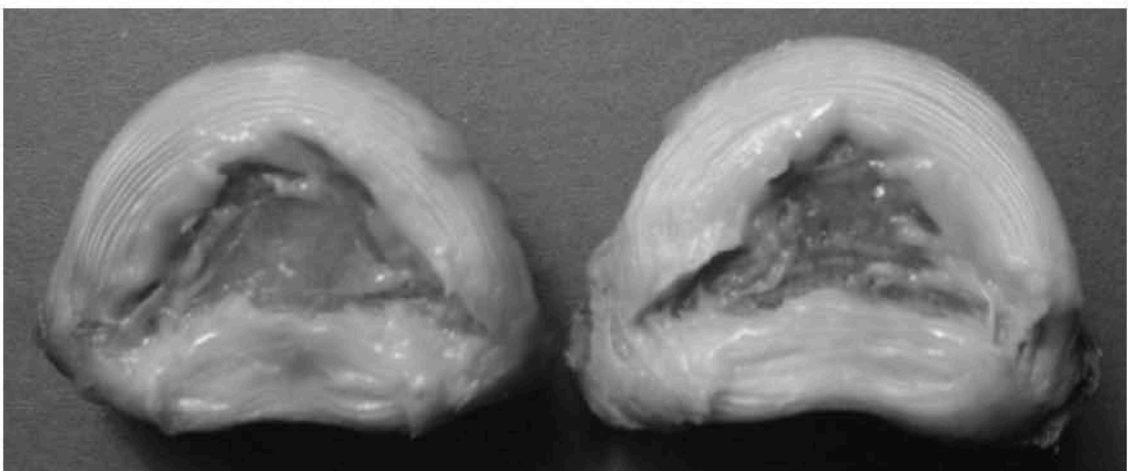

c

Supplement: MOESM2 [file 9510962]
